# Supplementary material for: Highly sensitive and convenient aptasensor based on Au NPs@Ce-TpBpy COF for quantitative determination of zearalenone
Source: Royal Society of Chemistry journal article supplement (doi:10.1039/d2ra02093a), 2022-01-01
Supplement: d2ra02093a1.pdf [file d2ra02093a1.pdf]

## Support information

### Highly sensitive and convenient aptasensor based on Au NPs@Ce-TpBpy COF for quantitative determination of zearalenone

Zhixiong Chen, Meng Yang, Ziyang Li, Wenchun Liao, Bengqi Chen, Tong Yang, Rong Hu, Yunhui Yang, \*Shuang Meng\*  
College of Chemistry and Chemical Engineering, Yunnan Normal University,  
Kunming, China, 650500.

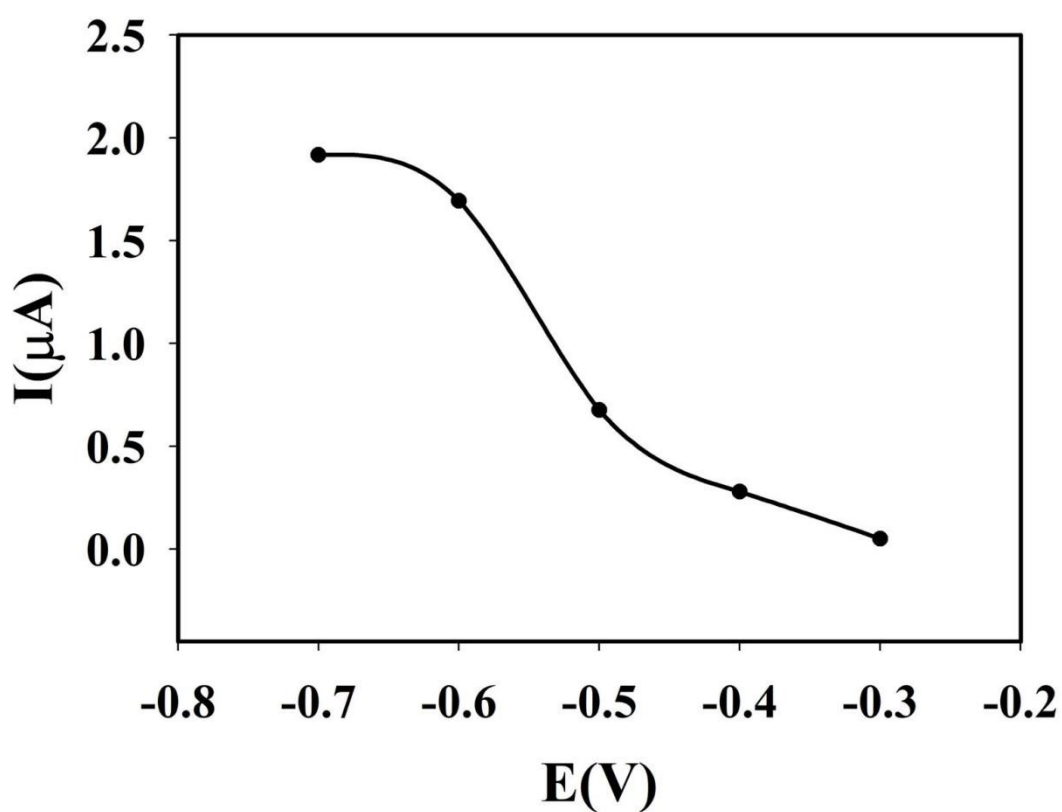

Fig. S1 Effect of the applied potential on the response current of aptasensor when the concentration of  $\text{H}_2\text{O}_2$  was 0.1  $\text{mmol/L}$  in 0.2  $\text{mol/L}$  Tris acetic acid buffer solution (pH 7.0)
